# Supplementary material for: Outlining the Invisible: Experiences and Perspectives Regarding Concussion Recovery, Return-to-Work, and Resource Gaps
Source: MDPI journal article supplement (doi:10.3390/ijerph19138204), 2022-07-05
Supplement: s1 [file s1]

Table S1. Industries in which Workers were employed

| <b>Workers' Industry</b>            | <b>n (%)</b> |
|-------------------------------------|--------------|
| Healthcare                          | 15 (48.4)    |
| Arts, entertainment, and recreation | 7 (22.6)     |
| Scientific/technical services       | 3 (9.7)      |
| K-12 education                      | 2 (6.5)      |
| Construction                        | 1 (3.2)      |
| Transportation and warehousing      | 1 (3.2)      |
| Administrative support              | 1 (3.2)      |
| Security                            | 1 (3.2)      |

Table S2. Workplace and Healthcare Professionals' Occupations.

| <b>Workplace and Healthcare Professional Occupations</b> | <b>n (%)</b> |
|----------------------------------------------------------|--------------|
| Workplace professionals                                  |              |
| WorkSafeBC case manager                                  | 2 (12.5)     |
| Workers union advocate                                   | 1 (6.3)      |
| Healthcare professionals (employed at concussion clinic) |              |
| Occupational therapist                                   | 5 (31.3)     |
| Kinesiologist                                            | 2 (12.5)     |
| Psychologist                                             | 1 (6.3)      |
| Physician                                                | 1 (6.3)      |
| Neuropsychologist                                        | 1 (6.3)      |
| Physiotherapist                                          | 1 (6.3)      |
| Clinical counselor                                       | 1 (6.3)      |
| Office manager                                           | 1 (6.3)      |

Table S3. Themes and sub-themes extracted from Worker interviews

| Overarching Theme                              | Theme                                              | Sub-Theme                                                                                                    | Sub-Theme                                                                    |
|------------------------------------------------|----------------------------------------------------|--------------------------------------------------------------------------------------------------------------|------------------------------------------------------------------------------|
| 1. Facilitators to concussion recovery and RTW | A) Modifications                                   | A1) Modifications for concussion recovery                                                                    | A2) Modifications for RTW                                                    |
|                                                | B) Supportive managers and colleagues              |                                                                                                              |                                                                              |
|                                                | C) Patient resources                               |                                                                                                              |                                                                              |
|                                                | D) Access to healthcare professionals              | D1) Techniques to help them cope with and understand their concussions                                       |                                                                              |
|                                                | E) Social support                                  | E1) Family support                                                                                           | E2) Peer support                                                             |
|                                                | F) Strategies to cope with PCS                     |                                                                                                              |                                                                              |
| 2. Time off work                               |                                                    |                                                                                                              |                                                                              |
| 3. Barriers to concussion recovery and RTW     | A) Administrative barriers                         | A1) Locating forms, filing claims                                                                            |                                                                              |
|                                                | B) Barriers related to accessing information       | B1) Had to find own information                                                                              | B2) Not provided with any extra information or resources                     |
|                                                | C) Physician-related barriers                      | C1) Felt physicians did not provide enough information/treatment for their concussion or persistent symptoms | C2) Challenges related to diagnosis and treatment: undiagnosed, misdiagnosed |
|                                                | D) Lack of mental health resources post-concussion | D1) Physicians prescribed medication instead of treating underlying issue                                    |                                                                              |
|                                                |                                                    |                                                                                                              |                                                                              |

|                                                                           |                                                                                                           |                                                                                  |
|---------------------------------------------------------------------------|-----------------------------------------------------------------------------------------------------------|----------------------------------------------------------------------------------|
| E) Lack of social support or understanding from support networks          |                                                                                                           |                                                                                  |
| F) Lack of understanding from workers' compensation boards and insurers   | F1) Difficulty with claims, suspicion from insurers                                                       |                                                                                  |
| G) Lack of understanding from workplaces: employers, managers, colleagues | G1) Lack of awareness about modifications/accommodations post-concussion; industry-specific modifications | G2) Lack of awareness of long-term impacts of concussion and concussion recovery |

#### 4. Recommendations to support concussion recovery and RTW

|                                                                               |                                                                                                                                                                                      |                                                                                                      |
|-------------------------------------------------------------------------------|--------------------------------------------------------------------------------------------------------------------------------------------------------------------------------------|------------------------------------------------------------------------------------------------------|
| A) Improve concussion resources                                               | A1) Better resources for patients recovering from concussion (e.g., advocate)                                                                                                        |                                                                                                      |
| B) Wider reaching concussion awareness, education, and training at all levels | B1) Training and education to increase understanding and empathy with respect to concussion recovery for workplaces, insurers, workers' compensation boards, and families/caregivers | B2) Increase awareness of limitations due to concussion symptoms and long-term effects of concussion |
| C) Mental health resources for concussion recovery                            |                                                                                                                                                                                      |                                                                                                      |
| D) Standardize concussion care                                                |                                                                                                                                                                                      |                                                                                                      |

---

Table S4. Themes and sub-themes extracted from Workplace and Healthcare Professionals interviews

| Overarching Theme                   | Theme                                                                           | Sub-Theme                                                                             | Sub-Theme                                                                                      |
|-------------------------------------|---------------------------------------------------------------------------------|---------------------------------------------------------------------------------------|------------------------------------------------------------------------------------------------|
| 1. Current RTW practices/procedures | A) Advocating for patients/clients                                              |                                                                                       |                                                                                                |
|                                     | B) Administrative                                                               | B1) Intake assessments, injury legitimacy, processing claims and complaints           |                                                                                                |
|                                     | C) Generating RTW plan                                                          | C1) Difficulty collaborating with workplaces                                          |                                                                                                |
|                                     | D) Provide patients/clients with concussion information                         |                                                                                       |                                                                                                |
| 2. Workplace gaps                   | A) Systemic issues                                                              | A1) Access to all populations (e.g., rural)                                           | A2) No resources on how to treat different concussion 'trajectories'; no standardized response |
|                                     | B) Lag in time from injury to involvement in case                               |                                                                                       |                                                                                                |
|                                     | C) Lack of knowledge among insurers and workers' compensation boards            | C1) Believe every concussion follows the same recovery pattern; lack of understanding |                                                                                                |
|                                     | D) Lack of understanding of concussion among the individual with the concussion |                                                                                       |                                                                                                |
|                                     | E) Lack of mental health information/resources post-concussion                  |                                                                                       |                                                                                                |

3.  
Recommendations  
to support  
concussion recovery  
and RTW

- |                                                                                                                            |                                                  |                                                        |
|----------------------------------------------------------------------------------------------------------------------------|--------------------------------------------------|--------------------------------------------------------|
| A) Increased concussion education for all individuals involved in concussion recovery, including the individual themselves | A1) Every concussion is different                |                                                        |
| B) Increased awareness on accommodations/workplace modifications post-concussion                                           | B1) Industry-specific recommendations/guidelines | B2) Collaboration between stakeholders involved in RTW |
| C) Better resources for families/caregivers                                                                                |                                                  |                                                        |
| D) Standardize concussion care and messaging                                                                               |                                                  |                                                        |
-

**Table S5.** Length of Time Workers were off Work Post-Concussion.

| <b>Length of Time</b>           | <b>n (%)</b> |
|---------------------------------|--------------|
| No time off                     | 5 (16.1)     |
| Returned to work after 1-2 days | 1 (3.2)      |
| Returned to work after 1 week   | 3 (9.7)      |
| Returned to work after 2 weeks  | 1 (3.2)      |
| Returned to work after 3 weeks  | 2 (6.5)      |
| Returned to work after 4 weeks  | 2 (6.5)      |
| Returned to work after 12 weeks | 4 (12.9)     |
| Long-term disability or leave   | 11 (35.5)    |
| Unspecified time off work       | 2 (6.5)      |
